# Supplementary material for: Identification of a Prognostic Signature Composed of GPI, IL22RA1, CCT6A and SPOCK1 for Lung Adenocarcinoma Based on Bioinformatic Analysis of lncRNA-Mediated ceRNA Network and Sample Validation
Source: PubMed Central journal article supplement (PMC9012227; doi:10.3389/fonc.2022.844691), 2022-03-28
Supplement: DataSheet_1.pdf [file DataSheet_1.pdf]

## Supplementary Material

### 1 Supplementary Figures and Table

#### 1.1 Supplementary Figures

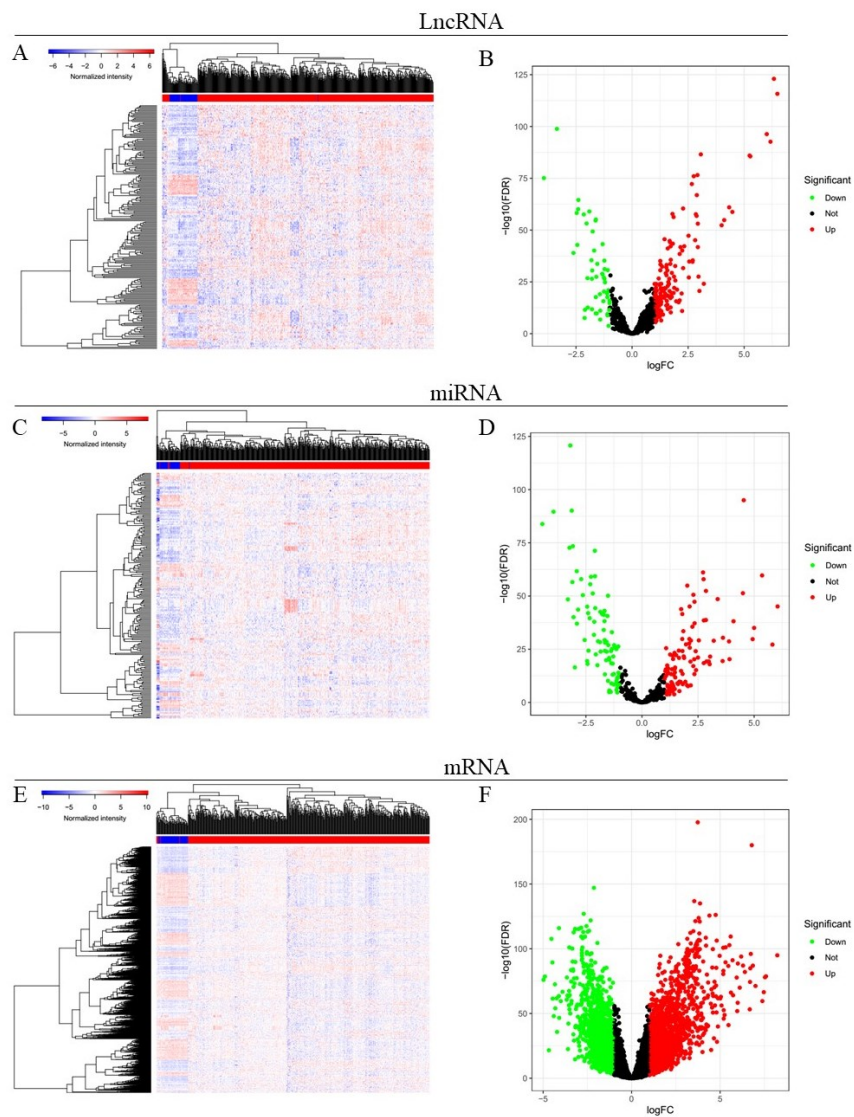

**Supplementary Figure 1.** Identification of differentially expressed lncRNA, miRNA and mRNA in 497 lung adenocarcinoma (LUAD) and 54 adjacent nontumor tissues. (A, C, E) The heatmaps of genome-wide differentially expressed lncRNA (A), miRNA (C) and mRNA (E) in the TCGA\_LUAD database. (B, D, F) Volcano plots of differentially expressed lncRNA (B), miRNA (D) and mRNA (F)



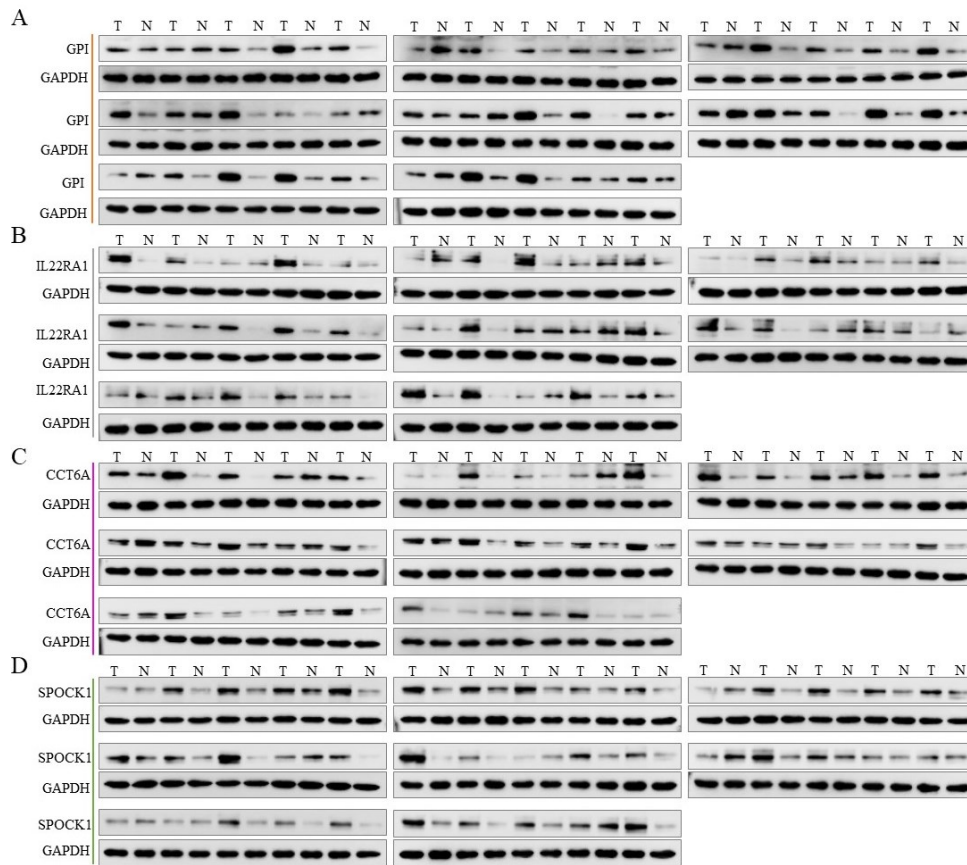

**Supplementary Figure 4.** Expression levels of GPI (A), IL22RA1 (B), CCT6A (C) and SPOCK1 (D) proteins in 40 paired LUAD and adjacent nontumor tissues were analyzed by Western blot.

## 1.2 Supplementary Table

**Supplementary Table 1.** The antibodies used in this study

| <b>Antibodies</b>  | <b>Catalog#</b> | <b>Source</b>             |
|--------------------|-----------------|---------------------------|
| anti-GPI (AMF)     | #57893          | Cell Signaling Technology |
| anti-GAPDH         | 60004-1-Ig      | Proteintech               |
| anti- IL22RA1      | ab5984          | Abcam                     |
| anti- CCT6A        | ab110905        | Abcam                     |
| anti- SPOCK1       | ab229935        | Abcam                     |
| anti-PI3K          | #4249           | Cell Signaling Technology |
| anti-p-PI3K(Y458)  | ab278545        | Abcam                     |
| anti-AKT           | 60203-2-Ig      | Proteintech               |
| anti-p-AKT(Ser473) | #4060           | Cell Signaling Technology |
| anti-E-cadherin    | #14472          | Cell Signaling Technology |
| anti-N-cadherin    | #14215          | Cell Signaling Technology |
